# Supplementary material
Source: PubMed Central journal article supplement (PMC6594709)
Supplement: NIHMS995319-supplement-supplemental.pdf [file NIHMS995319-supplement-supplemental.pdf]

000  
001  
002  
003  
004  
005  
006  
007  
008  
009  
010  
011  
012  
013  
014  
015  
016  
017  
018  
019  
020

# Supplementary Material for Learning to Annotate Facial Action Units for Online Images

Anonymous ICCV submission

Paper ID 2547

## Abstract

054  
055  
056  
057  
058  
059  
060  
061  
062  
063  
064  
065  
066  
067  
068  
069  
070  
071  
072  
073  
074

*This material includes more results that cannot be fitted into the main paper due to space limitation. In specific, we provides more qualitative analysis of the proposed weakly supervised clustering method.*

## 1. Qualitative analysis on weakly supervised clustering

075  
076  
077  
078  
079  
080  
081  
082  
083  
084  
085  
086  
087  
088  
089

This section shows more qualitative results of the proposed scalable weakly supervised clustering (WSC), t-SNE visualization of WSC embeddings and the corrections of annotations. Recall that we modeled WSC as a variant of spectral clustering with scatterness constraints, which learns an optimal embedding space where images with similar appearance and weak annotations are more likely to be in the same neighborhood. Details can be found in Section 3.1 of the main paper. Weak annotations can be query string or meta data *etc.* As mentioned in Section 4.1 of the main paper, the weak annotations used in this paper are the AU predictions of the pre-trained classifiers on BP4D.

090  
091  
092  
093  
094  
095  
096  
097  
098  
099  
100  
101  
102  
103  
104  
105  
106  
107

**Scalable weakly supervised clustering:** Fig. 1(a) illustrates the objective value of scalable weakly spectral clustering (sWSC) optimized by the accelerated stochastic gradient method, as discussed in Section 3.2 in the main paper. The figure was obtained by running sWSC on clustering  $\sim 200,000$  images of EmotioNet into two clusters using weak annotations of AU12. Although sWSC is stochastic-based, we can observe that convergence happened at around #5000 iterations. Fig. 1(b) shows the average images of two different clusters. As can be seen, each of these two clusters tends to group images from different modes of facial actions. On images of the cluster denoted as “AU 1+2”, we observed more frequent AUs 1 and 2. The other cluster, denoted as “AU 6+12”, exhibits strong lips corner puller and cheek raiser that directly corresponds to AU 6 and 12. This observation justifies that the proposed WSC can preserve both visually similar images while at the same time meaningful AU combinations, and meanwhile is scalable to large amount of images.

**t-SNE visualization of WSC embeddings:** To further understand the learned WSC embedding (denoted as  $\mathbf{W}$  in the main paper), we examined the closeness of the images using t-SNE embedding. Fig. 2 shows the embedding and zoomed-in neighborhood to facilitate examination. As can be seen, samples with cheek raiser (AU6) and lips corner puller (AU12) bounded with red boxes are grouped in the lower area of the figure. Regardless of lighting conditions and head poses, most images within this neighborhood contain either subtle or obvious appearance of AU6 or AU12. On the other hand, Samples with eyebrow puller bounded with blue boxes are shown in the upper areas of the embedding space. This shows WSC embedding obtains meaningful representations for AU annotation.

**Corrections of annotations:** EmotioNet is collected from the online images with query strings. Using the weak annotations (*e.g.* queries or AUs obtained by pre-trained model) directly as the supervision easily leads to get the sub-optimal generalization by the inaccurate classifier. This scenario even happens for manually annotations. The proposed WSC can correct the possible inaccurate annotations for weak annotations and even for humans annotations. We show more qualitative results of using WSC to correct manually annotations here. Partial results were shown in Section 4.1 of the main paper. The left most column of Fig. 3 shows the canonical faces of the 6 AUs used in the paper. On the right of each row, we show images that WSC was able to correct their annotations. In other words, these images were originally annotated as inactive with respect to each AU. WSC discovered these patterns and demonstrated good consistency with FACS-coding, showing that noisy annotations can be further cleaned using the proposed WSC.

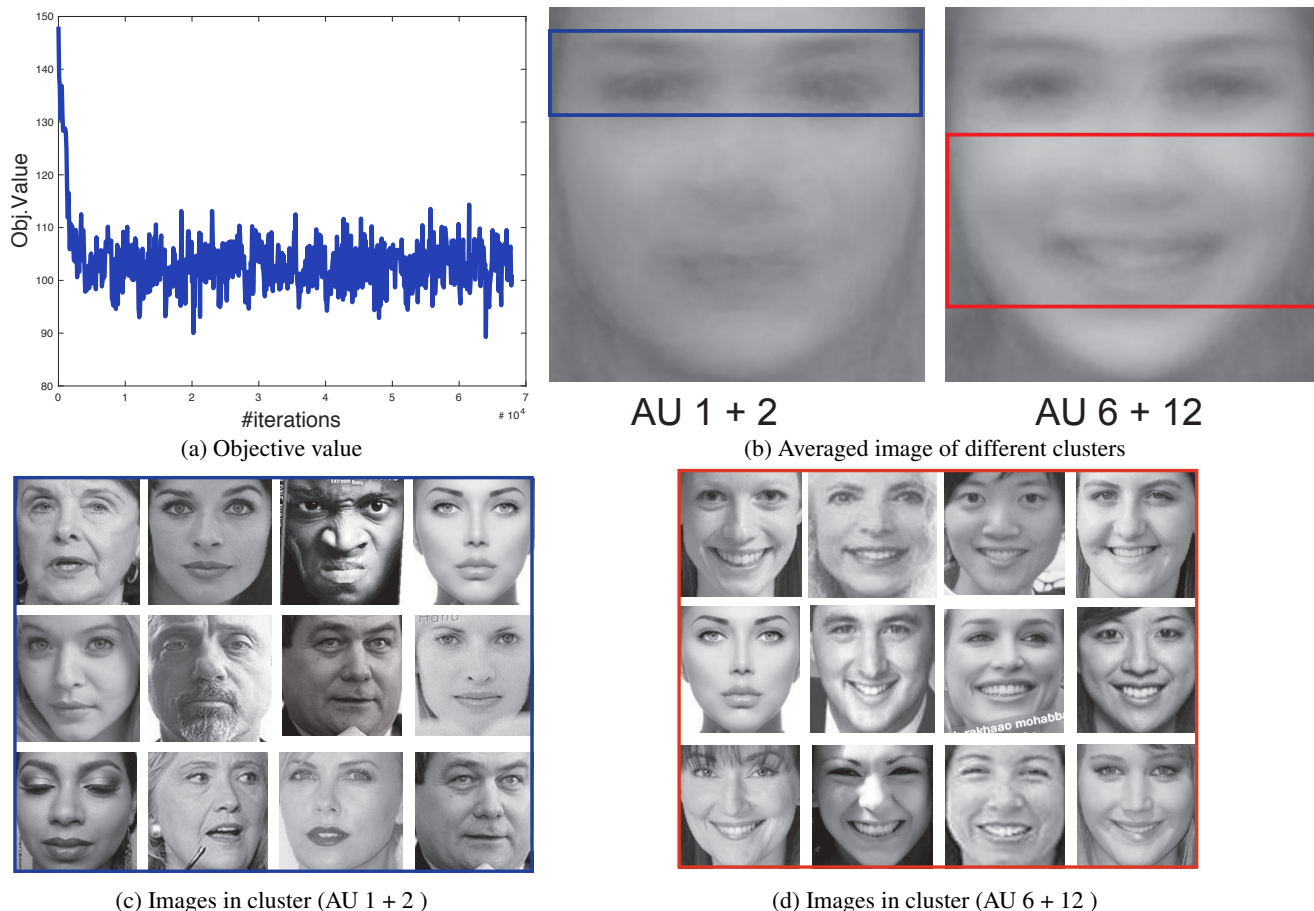

Figure 1. Visualization of averaged images of different clusters upon convergence. (a) shows the objective value v.s. the number of iterations of scalable weakly spectral clustering (sWSC). The experiments are conducted on  $\sim 200,000$  images of EmotionNet with weak annotations of AU12. (b) shows the averaged images of two different clusters. We denoted different averaged images as “AU1+2” and “AU6+12” to indicate WSC’s power in grouping visually and semantically similar images. (c) and (d) are the images in these two clusters.

## 2. Derivation of accelerated stochastic optimization method

This section provides more details in deriving the accelerated stochastic algorithm as discussed in Section 3.2 of the main paper. Specifically, during the group-wise optimization for each  $\mathbf{W}_g$ , we write:

$$\min_{\mathbf{W}_g} \frac{1}{2} \|\mathbf{W}_g - \mathbf{V}_g\|_F^2 + \frac{\tilde{\lambda}}{n_g} \text{Tr}(\mathbf{W}_g \mathbf{C}_g \mathbf{W}_g^\top) \quad (1)$$

Taking derivative of equation (1) as:

$$\begin{aligned} \mathbf{W}_g - \mathbf{V}_g + \frac{2\tilde{\lambda}}{n_g} \mathbf{C}_g \mathbf{W}_g &= 0 \\ (\mathbf{I}_{n_g} + \frac{2\tilde{\lambda}}{n_g} \mathbf{C}_g) \mathbf{W}_g &= \mathbf{V}_g \end{aligned} \quad (2)$$

For  $\mathbf{C}_g$  is a centering matrix, which has the eigenvalue 1 of multiplicity  $n - 1$  and eigenvalue 0 of multiplicity 1. In addition,  $\tilde{\lambda} > 0$ . Thus,  $\det(\mathbf{I}_{n_g} + \frac{2\tilde{\lambda}}{n_g} \mathbf{C}_g) \neq 0$ . The optimal solution for (1) can be obtained as  $\mathbf{W}_g^* = (\mathbf{I}_{n_g} + \frac{2\tilde{\lambda}}{n_g} \mathbf{C}_g)^{-1} \mathbf{V}_g$ .

216  
217  
218  
219  
220  
221  
222  
223  
224  
225  
226  
227  
228  
229  
230  
231  
232  
233  
234  
235  
236  
237  
238  
239  
240  
241  
242  
243  
244  
245  
246  
247  
248  
249  
250  
251  
252  
253  
254  
255  
256  
257  
258  
259  
260  
261  
262  
263  
264  
265  
266  
267  
268  
269

270  
271  
272  
273  
274  
275  
276  
277  
278  
279  
280  
281  
282  
283  
284  
285  
286  
287  
288  
289  
290  
291  
292  
293  
294  
295  
296  
297  
298  
299  
300  
301  
302  
303  
304  
305  
306  
307  
308  
309  
310  
311  
312  
313  
314  
315  
316  
317  
318  
319  
320  
321  
322  
323

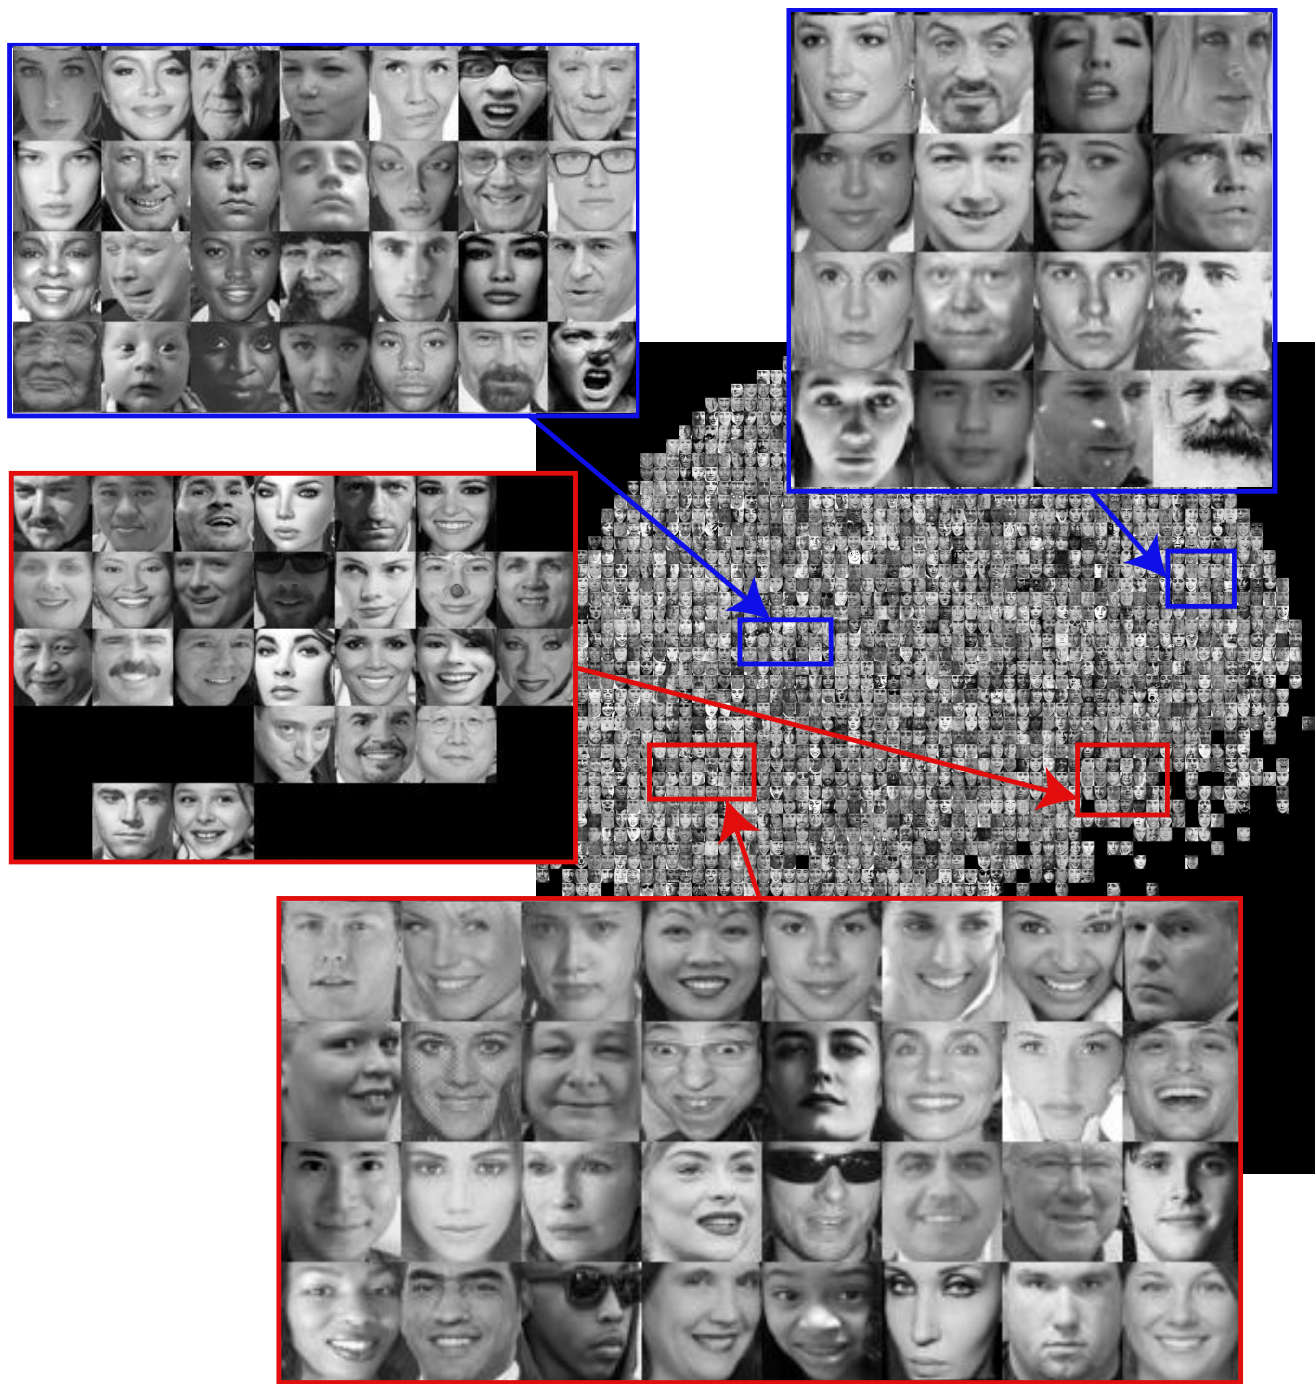

Figure 2. t-SNE visualization of the learned WSC embedding on ~200,000 images of EmotioNet.

324  
325  
326  
327  
328  
329  
330  
331  
332  
333  
334  
335  
336  
337  
338  
339  
340  
341  
342  
343  
344  
345  
346  
347  
348  
349  
350  
351  
352  
353  
354  
355  
356  
357  
358  
359  
360  
361  
362  
363  
364  
365  
366  
367  
368  
369  
370  
371  
372  
373  
374  
375  
376  
377

378  
379  
380  
381  
382  
383  
384  
385  
386  
387  
388  
389  
390  
391  
392  
393  
394  
395  
396  
397  
398  
399  
400  
401  
402  
403  
404  
405  
406  
407  
408  
409  
410  
411  
412  
413  
414  
415  
416  
417  
418  
419  
420  
421  
422  
423  
424  
425  
426  
427  
428  
429  
430  
431

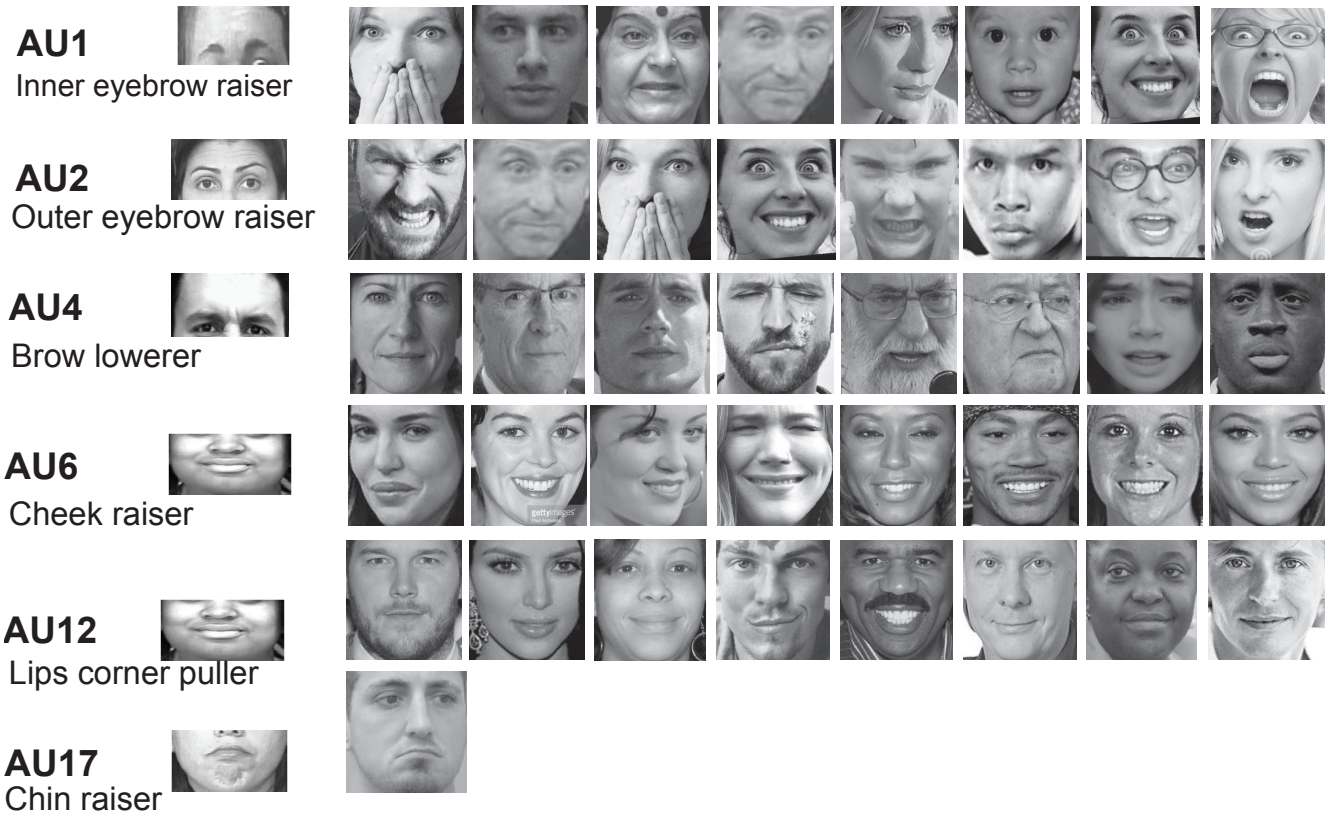

Figure 3. An illustration of samples that the proposed WSC is able to correct for human annotations in the EmotioNet dataset. Each row shows the corrected samples of different AUs. The left most columns are definitions of AUs and the samples in correspondence to FACS. The samples corrected in EmotioNet are shown in the right column.
